# Supplementary material for: Metal-containing DNA hairpins as hybridization probes
Source: Royal Society of Chemistry journal article supplement (doi:10.1039/b100036p), 2001-01-01
Supplement: b100036p.doc [file b100036p.doc]

Metal-containing DNA hairpins as hybridization probes

Hima S. Joshi and Yitzhak Tor*

# Department of Chemistry and Biochemistry

# University of California, San Diego, La Jolla, CA 92093-0358

## Supplementary Material

**Oligonucleotide Synthesis.** All oligonucleotides were prepared on a 0.2 mol scale on 500-Å CPG solid support using a Milligen Cyclone Plus DNA synthesizer. The metal-modified residue was introduced site-specifically by trityl-off synthesis of the base oligonucleotide, followed by the manual coupling of the desired metal-modified phosphoramidite. In a typical procedure, the metal-modified nucleoside (0.02 mmol) was dissolved in 200 L of 0.5 M (1*H*)-tetrazole in acetonitrile. This activated phosphoramidite solution was immediately applied via syringe to the synthesis column containing the CPG-bound base oligonucleotide. Coupling times for the modified phosphoramidites were extended to 5 min to ensure maximum coupling efficiency. The column was rinsed with acetonitrile (2 mL) and returned to the automated synthesizer for the standard oxidation and capping steps. Coupling efficiencies for the base-modified phosphoramidites as monitored by trityl cation assay were typically above 90%. The remainder of the desired oligonucleotide was synthesized using the trityl-off procedure. The oligonucleotide was cleaved from the solid support by treatment with 1.0 mL 30% aqueous ammonium hydroxide for 3 h at room temperature. Oligonucleotides containing no modified bases were synthesized using standard Milligen/Biosearch Cyclone Plus protocols. The crude product from the automated oligonucleotide synthesis was lyophilized and purified by preparative 20% denaturing polyacrylamide gel electrophoresis. The product was visualized by UV shadowing, and the desired band was excised from the gel. The band was crushed, then extracted with 1 TBE buffer pH 8.3 (90 mM Tris, 90 mM boric acid, 1 mM EDTA) for 24-36 h. The extract was filtered (0.45 m nylon) and desalted using a Sep-pak cartridge (Waters Corporation, MA). Oligonucleotides were eluted from the Sep-pak cartridge using 20% acetonitrile/water. Oligonucleotides were analyzed and, if necessary, further purified by HPLC (Vydac C8 column, 10x250 mm, 5, 300 Å pore size). The HPLC mobile phase was a 1-12% acetonitrile gradient in 50 mM triethylammonium acetate pH 7.0 over 12 minutes, followed by a 12-40% acetonitrile gradient in the next 9 minutes. The concentrations of the single-stranded oligonucleotides were determined at 260 nm using the following molar extinction coefficients: 15400 (A), 11700 (G), 8800 (T), 7300 (C), 36500 (URu), 33200 (UOs). This procedure assumes that the absorption properties of the free 5-modified 2’-deoxyuridine nucleosides remain unchanged upon incorporation into single stranded DNA.

**Enzymatic Degradation of Oligonucleotides.** In a typical procedure, the following reagents were added to a 2 nmol pellet of DNA: 10L of 1M MgCl2, 10L of 10xAP Buffer (New England Biolabs), 2L (0.3U/L) of Nuclease P1 (Boehringer Mannheim), 1.5L (0.003 U/L) of snake venom phosphodiesterase (Boehringer Mannheim), 1.5L (10 U/L) of alkaline phosphatase (New England Biolabs) and 75 L of water. The reaction mixture was incubated for 8 hours at 37°C, passed through a 0.45 M Nylon-66 micro-centrifuge filter (Rainin) and analyzed by HPLC (Vydac C18 column, 4.6 x 250 mm, 5 RP-silica) using a photodiode array detector to monitor at 260 and 450 nm. The HPLC mobile phase was a 1-12% acetonitrile gradient in 100 mM triethylammonium acetate pH 5.5 over 12 minutes, followed by a 12-99% acetonitrile gradient in the next 18 minutes. Peaks were identified based on comparisons of UV spectra and retention times to standards. Ratios of nucleosides were determined based on integrations of peak areas at 260 nm. For the determination of the actual number of each nucleoside, the theoretical number of C bases was taken to be the reference.

**Table S1** Nucleotide Ratios as Determined by Enzyme

Digestion and HPLC Analysis

| Oligo. | C | G | T | A | URu,Os |
| --- | --- | --- | --- | --- | --- |
| **3** actual |  | 3.9 | 5.0 | 3.7 | 1.6 |
| theor. | 5 | 4 | 5 | 4 | 2 |
| **4a** actual |  | 4.9 | 4.1 | 6.5 | 0 |
| theor. | 4 | 5 | 4 | 7 | 0 |
| **4b** actual |  | 3.9 | 4.0 | 7.2 | 0 |
| theor. | 4 | 4 | 4 | 8 | 0 |
| **5** actual |  | 3.7 | 6.0 | 3.6 | 0.73 |
| theor. | 5 | 4 | 6 | 4 | 1 |

**Thermal Denaturation Studies.** All UV melting experiments were carried out in 10 mM NaH2PO4 buffer with 100 mM NaCl pH 7.0 for 2 µM solutions of duplex or hairpin. Thermal denaturation profiles were measured in a Teflon-stoppered 1.0 cm path length quartz cell on a Varian-Cary 1E spectrophotometer with a temperature-controlled cell compartment. Heating runs were performed at a scan rate of 1.0 °C min–1 with optical monitoring at 260 nm. *T*m values were determined by calculation of the first derivative of the resulting melting curves. Uncertainty in *T*m values is estimated to be  1°C. Figure S1 shows the thermal denaturation profiles of the heterodimetallated probe **3** and the control hairpin **5** in the presence and absence of **4a** and **4b**.

Normalized A260

Temperature (ºC)

**Figure S1** Thermal denaturation curves of hairpins and duplexes.
